# Supplementary material for: Microfluidic large-scale integration on a chip for mass production of monodisperse droplets and particles
Source: Royal Society of Chemistry journal article supplement (doi:10.1039/b713141k), 2007-11-23
Supplement: b713141k.pdf [file b713141k.pdf]

## Electronic Supplementary Information

### Supplemental Movie Captions:

cross128.mpg: Movie clip of the formation of O/W emulsion droplets in the module having 128 cross-junctions, recorded at 4000 fps. Disperse phase flow rate ( $Q_d$ ) was  $320.0 \text{ mL h}^{-1}$  and continuous phase flow rate ( $Q_c$ ) was  $480.0 \text{ mL h}^{-1}$ .

coflow128-Janus.mpg: Movie clip of the formation of Janus droplets in the module having 128 co-flow junctions, recorded at 4000 fps. Flow rates were  $Q_d = 128.0 \text{ mL h}^{-1}$  ( $64.0 \text{ mL h}^{-1} \times 2$ ) and  $Q_c = 1024 \text{ mL h}^{-1}$ .

coflow32-Janus.mpg: Movie clip of the formation of Janus droplets in the module having 32 co-flow junctions, recorded at 4000 fps. Flow rates were  $Q_d = 32.0 \text{ mL h}^{-1}$  ( $16.0 \text{ mL h}^{-1} \times 2$ ) and  $Q_c = 256.0 \text{ mL h}^{-1}$ .

coflow128-mono.mpg: Movie clip of the formation of O/W emulsion droplets in the module having 128 co-flow junctions, recorded at 2000 fps. Flow rates were  $Q_d = 256.0 \text{ mL h}^{-1}$  and  $Q_c = 1280 \text{ mL h}^{-1}$ .

All movies are prepared in MPEG-1 format.
